# Supplementary material
Source: MDPI journal article supplement (https://www.mdpi.com/1999-4907/13/10/1671)
Supplement: s1 [file s1]

**Table S1.** NCBI accession number of 33 chloroplast genomes.

| Number | Species                                           | Accession    |
|--------|---------------------------------------------------|--------------|
| 1      | <i>Pleioblastus argenteostriatus</i>              | OP036432     |
| 2      | <i>Pleioblastus pygmaea</i>                       | OP036435     |
| 3      | <i>Pleioblastus pygmaea</i> 'Disticha'            | OP036434     |
| 4      | <i>Sasaella kongosanensis</i> 'Aureostriatus'     | OP036438     |
| 5      | <i>Pleioblastus fortunei</i>                      | OP036433     |
| 6      | <i>Sasaella glabra</i> 'Albostrata'               | OP036436     |
| 7      | <i>Sasaella glabra</i>                            | OP036437     |
| 8      | <i>Sasaella hidaensis</i> var. <i>muraii</i>      | from article |
| 9      | <i>Pleioblastus amarus</i>                        | NC_043892    |
| 10     | <i>Pleioblastus maculatus</i>                     | NC_024723    |
| 11     | <i>Pleioblastus chino</i> f. <i>hisauchii</i>     | from article |
| 12     | <i>Pleioblastus kongosanensis</i>                 | from article |
| 13     | <i>Pleioblastus wuyishanensis</i>                 | from article |
| 14     | <i>Indosasa gigantea</i>                          | NC_046587    |
| 15     | <i>Pseudosasa cantorii</i>                        | NC_036824    |
| 16     | <i>Pseudosasa japonica</i>                        | NC_028328    |
| 17     | <i>Pseudosasa amabilis</i> var. <i>convexa</i>    | from article |
| 18     | <i>Pseudosasa guanxianensis</i>                   | from article |
| 19     | <i>Pseudosasa longiligula</i>                     | from article |
| 20     | <i>Pseudosasa magilaminaris</i>                   | from article |
| 21     | <i>Pseudosasa orthotropa</i>                      | from article |
| 22     | <i>Pseudosasa viridula</i>                        | from article |
| 23     | <i>Oligostachyum shiuyingianum</i>                | NC_024722    |
| 24     | <i>Oligostachyum oedogonatum</i>                  | from article |
| 25     | <i>Sinobambusa tootsik</i> var. <i>maeshimana</i> | from article |
| 26     | <i>Phyllostachys angusta</i>                      | NC_053647    |
| 27     | <i>Phyllostachys edulis</i>                       | HQ337796     |
| 28     | <i>Phyllostachys glauca</i>                       | NC_051535    |
| 29     | <i>Phyllostachys nigra</i> var. <i>henonis</i>    | NC_015826    |
| 30     | <i>Phyllostachys propinqua</i>                    | NC_016699    |
| 31     | <i>Phyllostachys sulphurea</i>                    | KJ722540     |
| 32     | <i>Zea mays</i>                                   | NC_001666    |
| 33     | <i>Oryza sativa</i>                               | NC_031333    |
